# Supplementary material for: Chronological Age Prediction: Developmental Evaluation of DNA Methylation-Based Machine Learning Models
Source: PubMed Central journal article supplement (PMC8819006; doi:10.3389/fbioe.2021.819991), 2022-01-24
Supplement: DataSheet1.pdf [file DataSheet1.pdf]

# Supplementary Figure S1

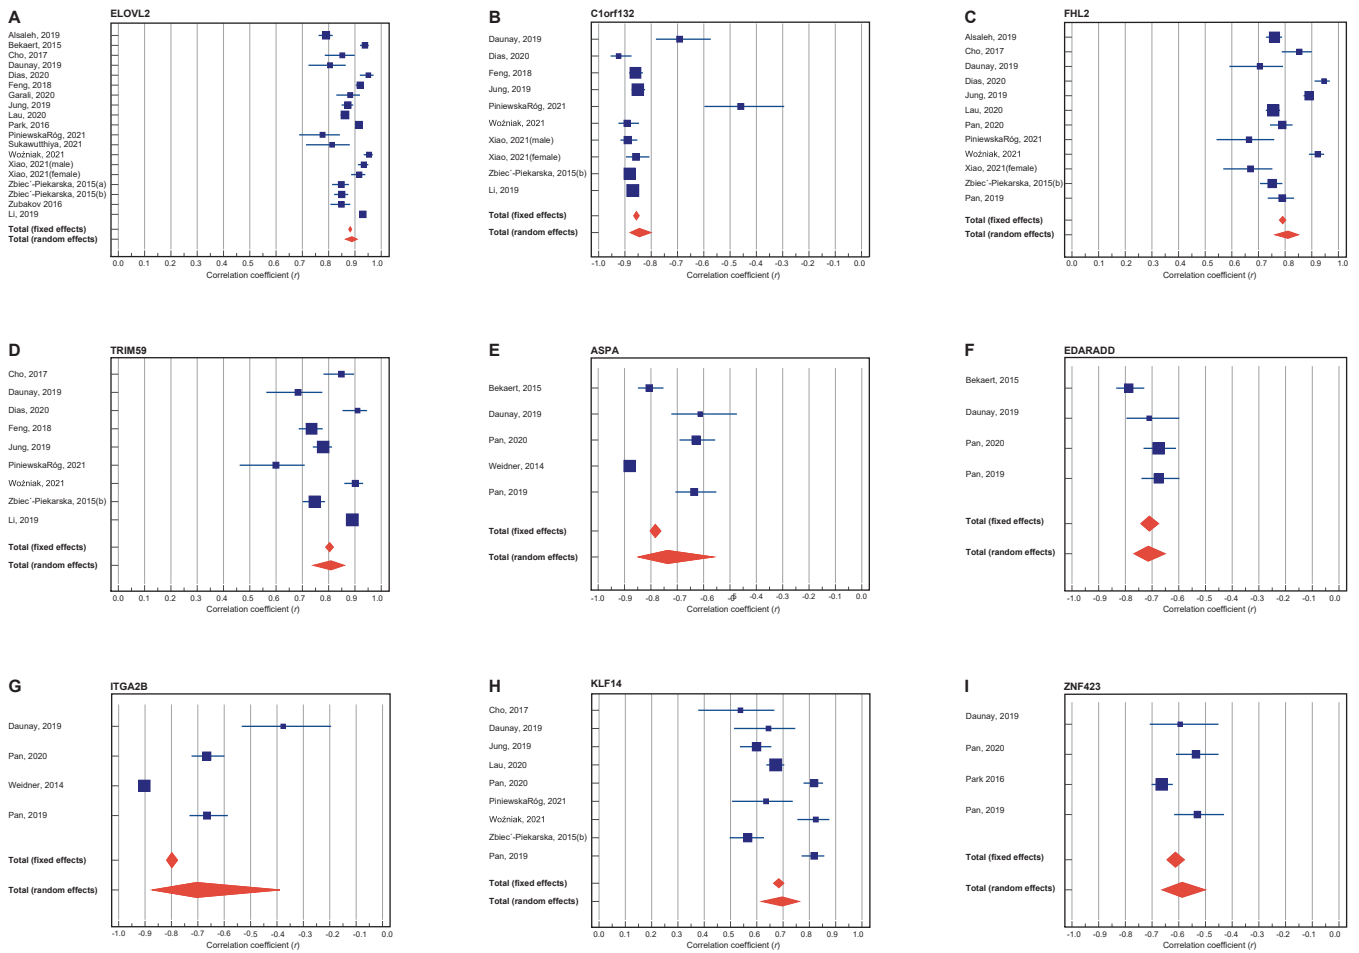

**Supplementary Figure S1** Detailed correlation coefficient ( $r$ ) meta-analysis forest plots of nine candidate DNA methylation biomarkers in meta cohort of 7084 individuals.

- A.** ELOVL2 ( $n = 5847$ ,  $r = 0.89$ ); **B.** C1orf132 ( $n = 2419$ ,  $r = 0.85$ ); **C.** FHL2 ( $n = 3768$ ,  $r = 0.81$ );  
**D.** TRIM59 ( $n = 2206$ ,  $r = 0.81$ ); **E.** ASPA ( $n = 1421$ ,  $r = 0.74$ ); **F.** EDARADD ( $n = 846$ ,  $r = 0.71$ );  
**G.** ITGA2B ( $n = 1215$ ,  $r = 0.71$ ); **H.** KLF14 ( $n = 2812$ ,  $r = 0.70$ ); **I.** ZNF423 ( $n = 1405$ ,  $r = 0.59$ ).

## Supplementary Figure S2

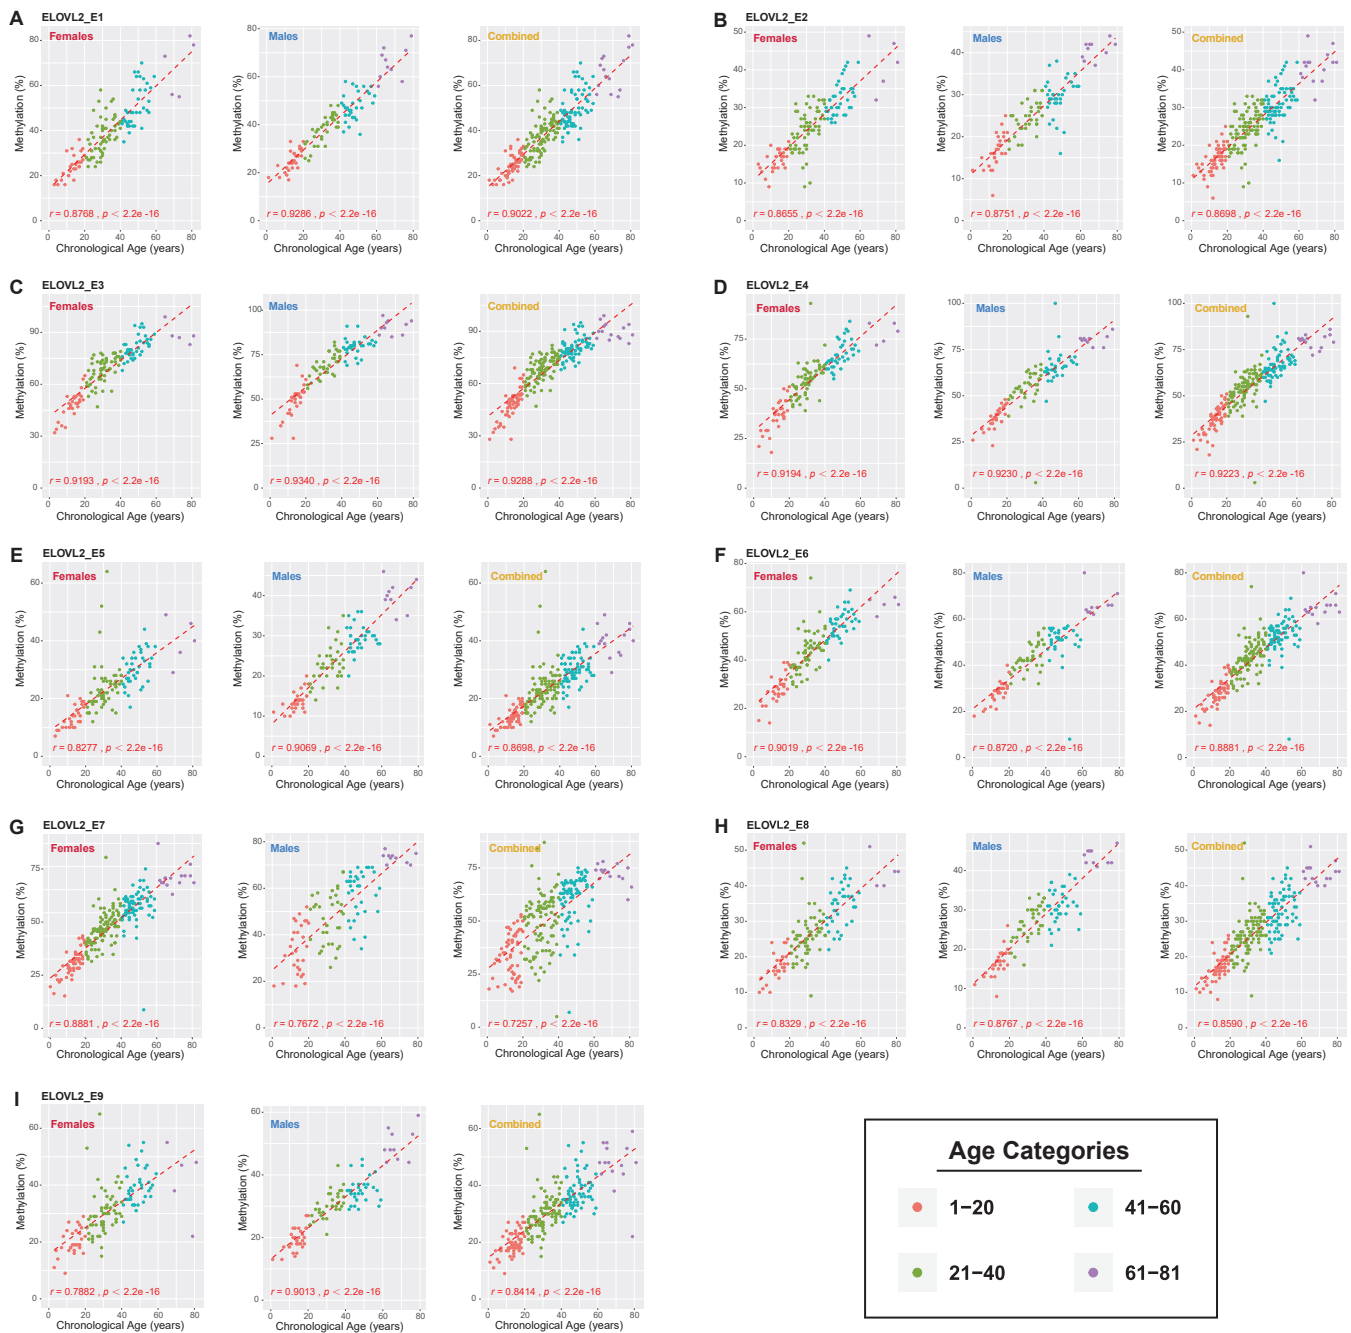

**Supplementary Figure S2** Spearman correlation analyses between different CpG methylation levels of ELOVL2 and the chronological ages of different gender datasets in CHS cohort (n = 240, blood samples).

**A.** ELOVL2\_E1; **B.** ELOVL2\_E2; **C.** ELOVL2\_E3; **D.** ELOVL2\_E4; **E.** ELOVL2\_E5; **F.** ELOVL2\_E6; **G.** ELOVL2\_E7; **H.** ELOVL2\_E8; **I.** ELOVL2\_E9;  
 Detailed CpG information in Supplementary Table S1.

## Supplementary Figure S3

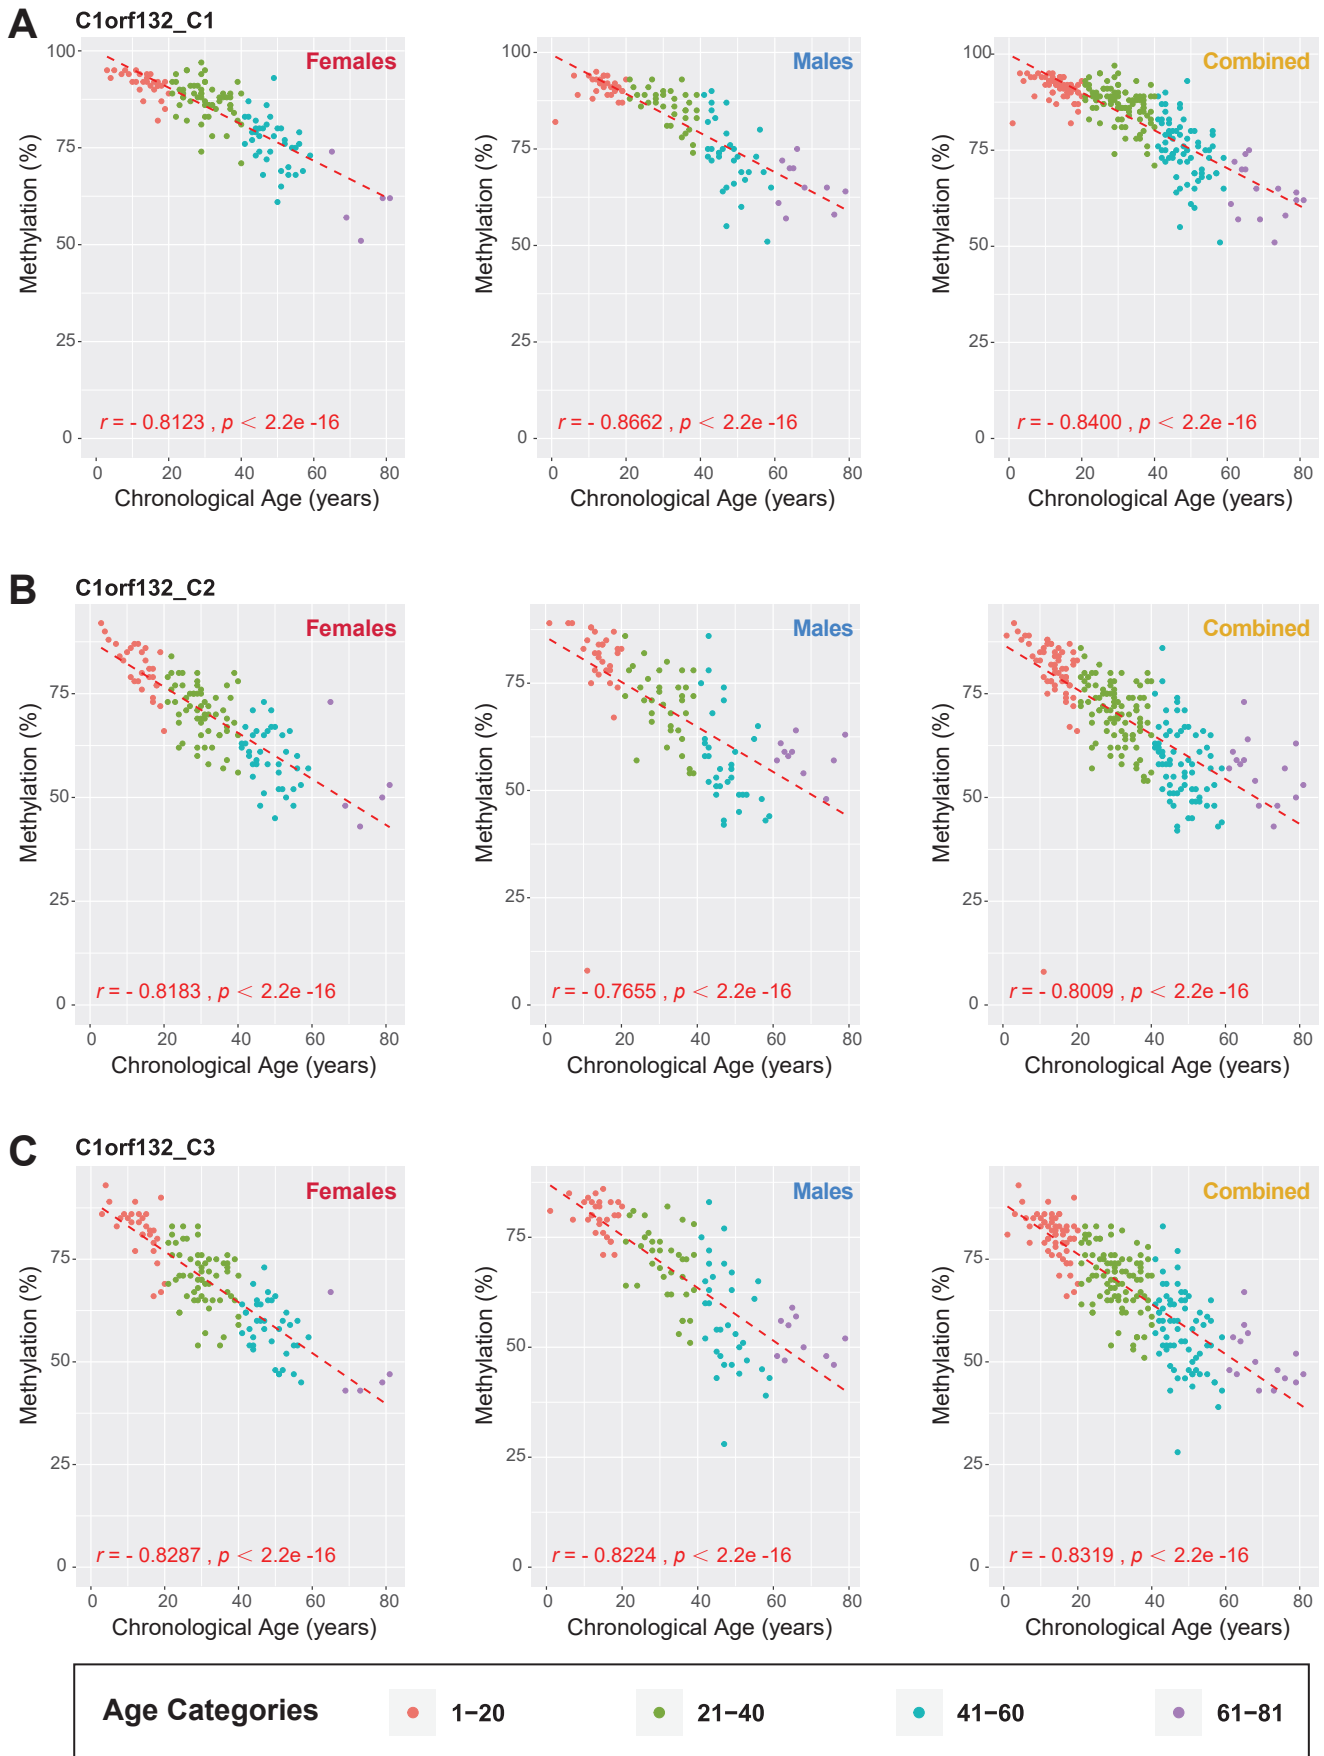

**Supplementary Figure S3** Spearman correlation analyses between different CpG methylation levels of C1orf132 and the chronological ages of different gender datasets in CHS cohort (n = 240, blood samples).

**A.** C1orf132\_C1; **B.** C1orf132\_C2; **C.** C1orf132\_C3; Detailed CpG information in Supplementary Table S1.

## Supplementary Figure S4

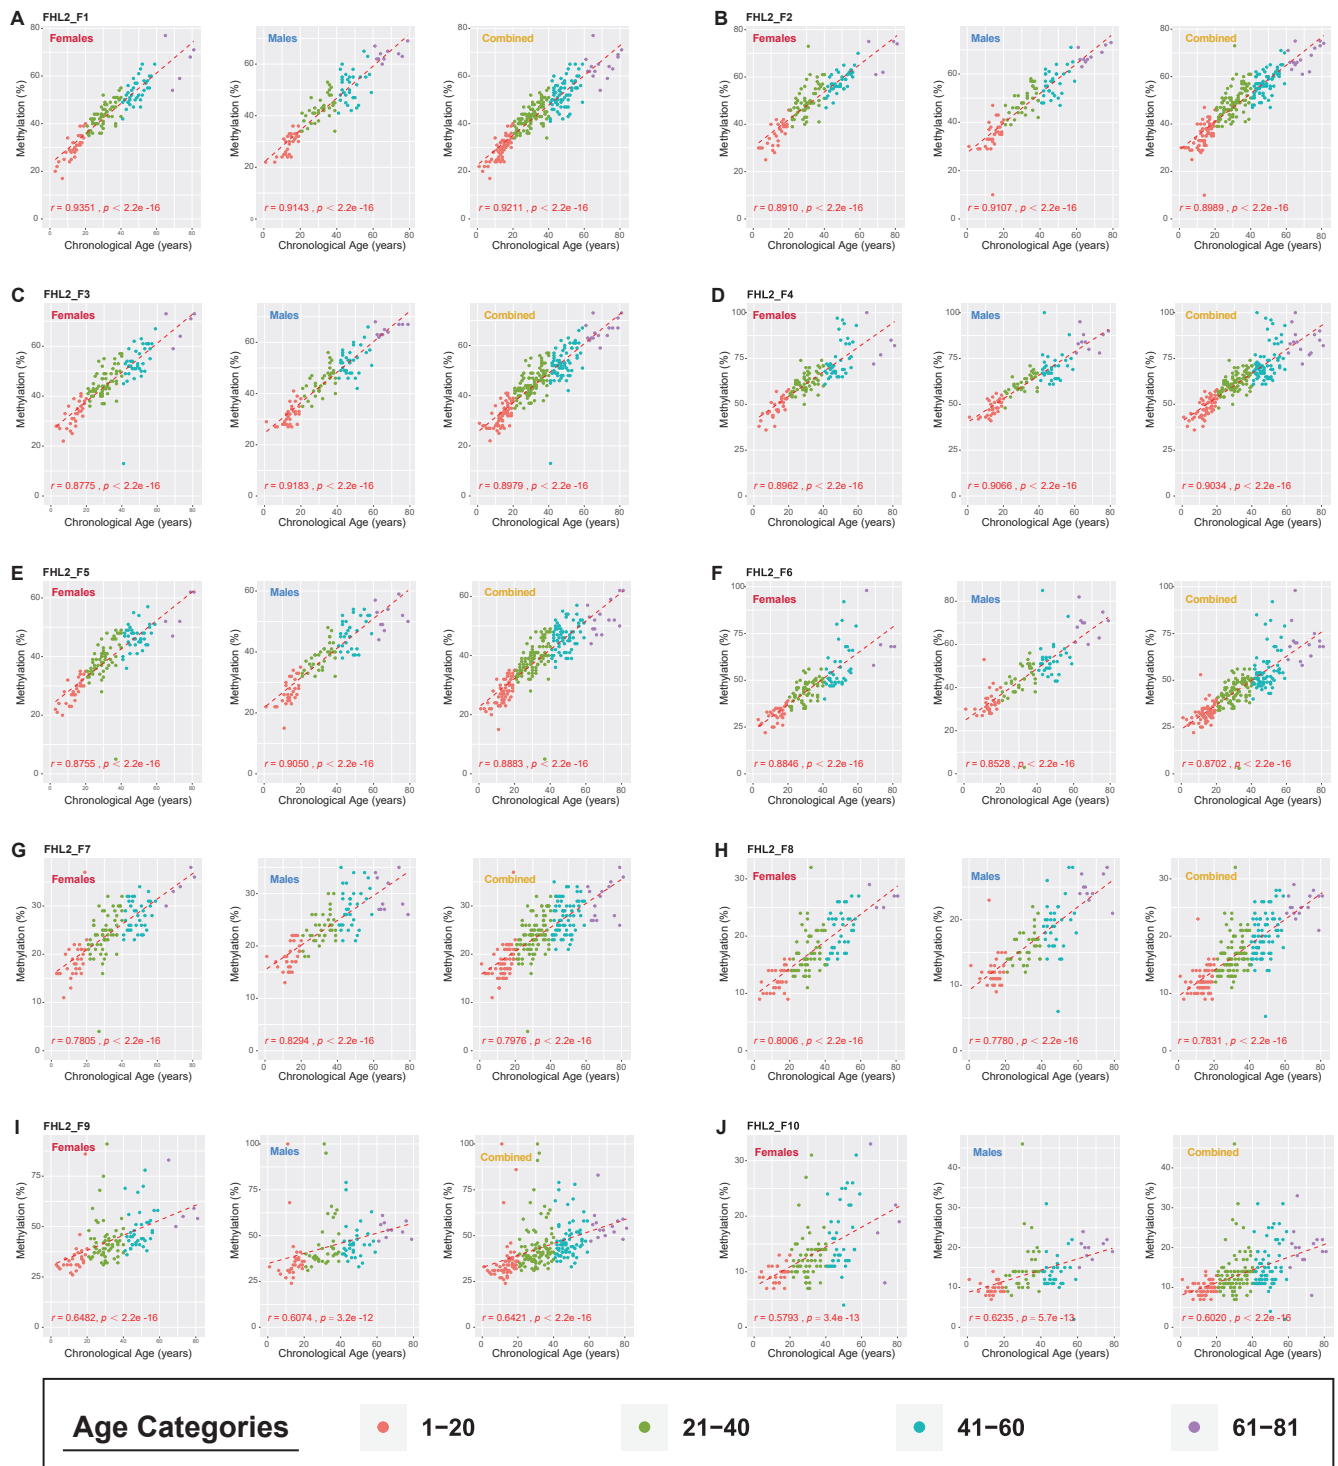

**Supplementary Figure S4** Spearman correlation analyses between different CpG methylation levels of FHL2 and the chronological ages of different gender datasets in CHS cohort (n = 240, blood samples).

**A. FHL2\_F1; B. FHL2\_F2; C. FHL2\_F3; D. FHL2\_F4; E. FHL2\_F5; F. FHL2\_F6; G. FHL2\_F7; H. FHL2\_F8; I. FHL2\_F9; J. FHL2\_F10;** Detailed CpG information in Supplementary Table S1.

## Supplementary Figure S5

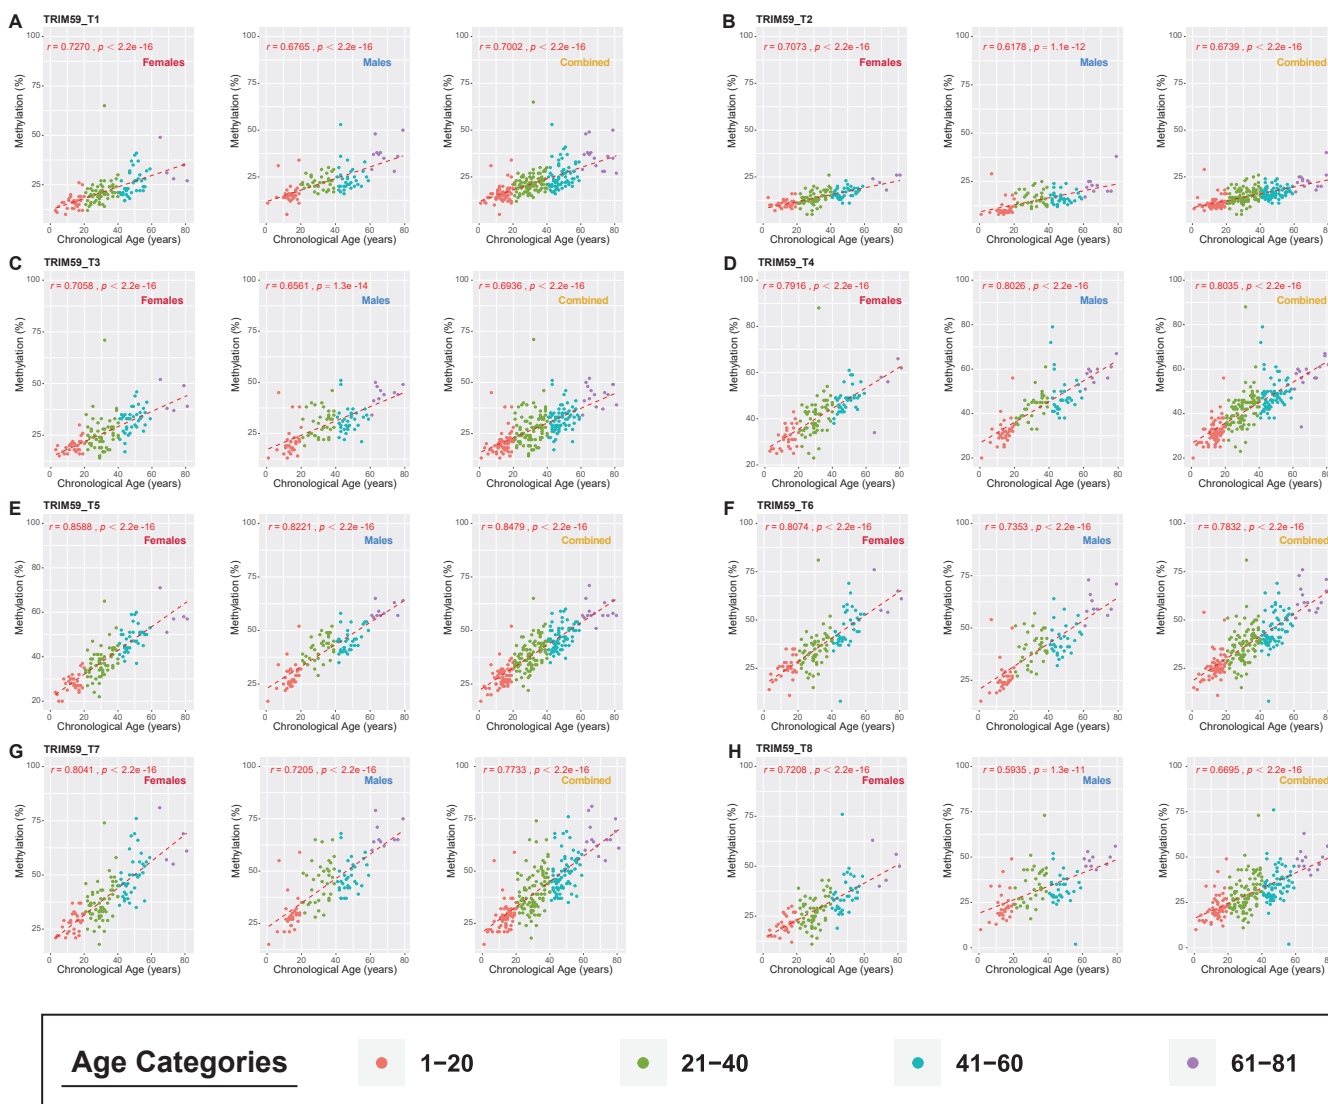

**Supplementary Figure S5** Spearman correlation analyses between different CpG methylation levels of TRIM59 and the chronological ages of different gender datasets in CHS cohort (n = 240, blood samples).

**A.** TRIM59\_T1; **B.** TRIM59\_T2; **C.** TRIM59\_T3; **D.** TRIM59\_T4;

**E.** TRIM59\_T5; **F.** TRIM59\_T6; **G.** TRIM59\_T7; **H.** TRIM59\_T8;

Detailed CpG information in Supplementary Table S1.

## Supplementary Figure S6

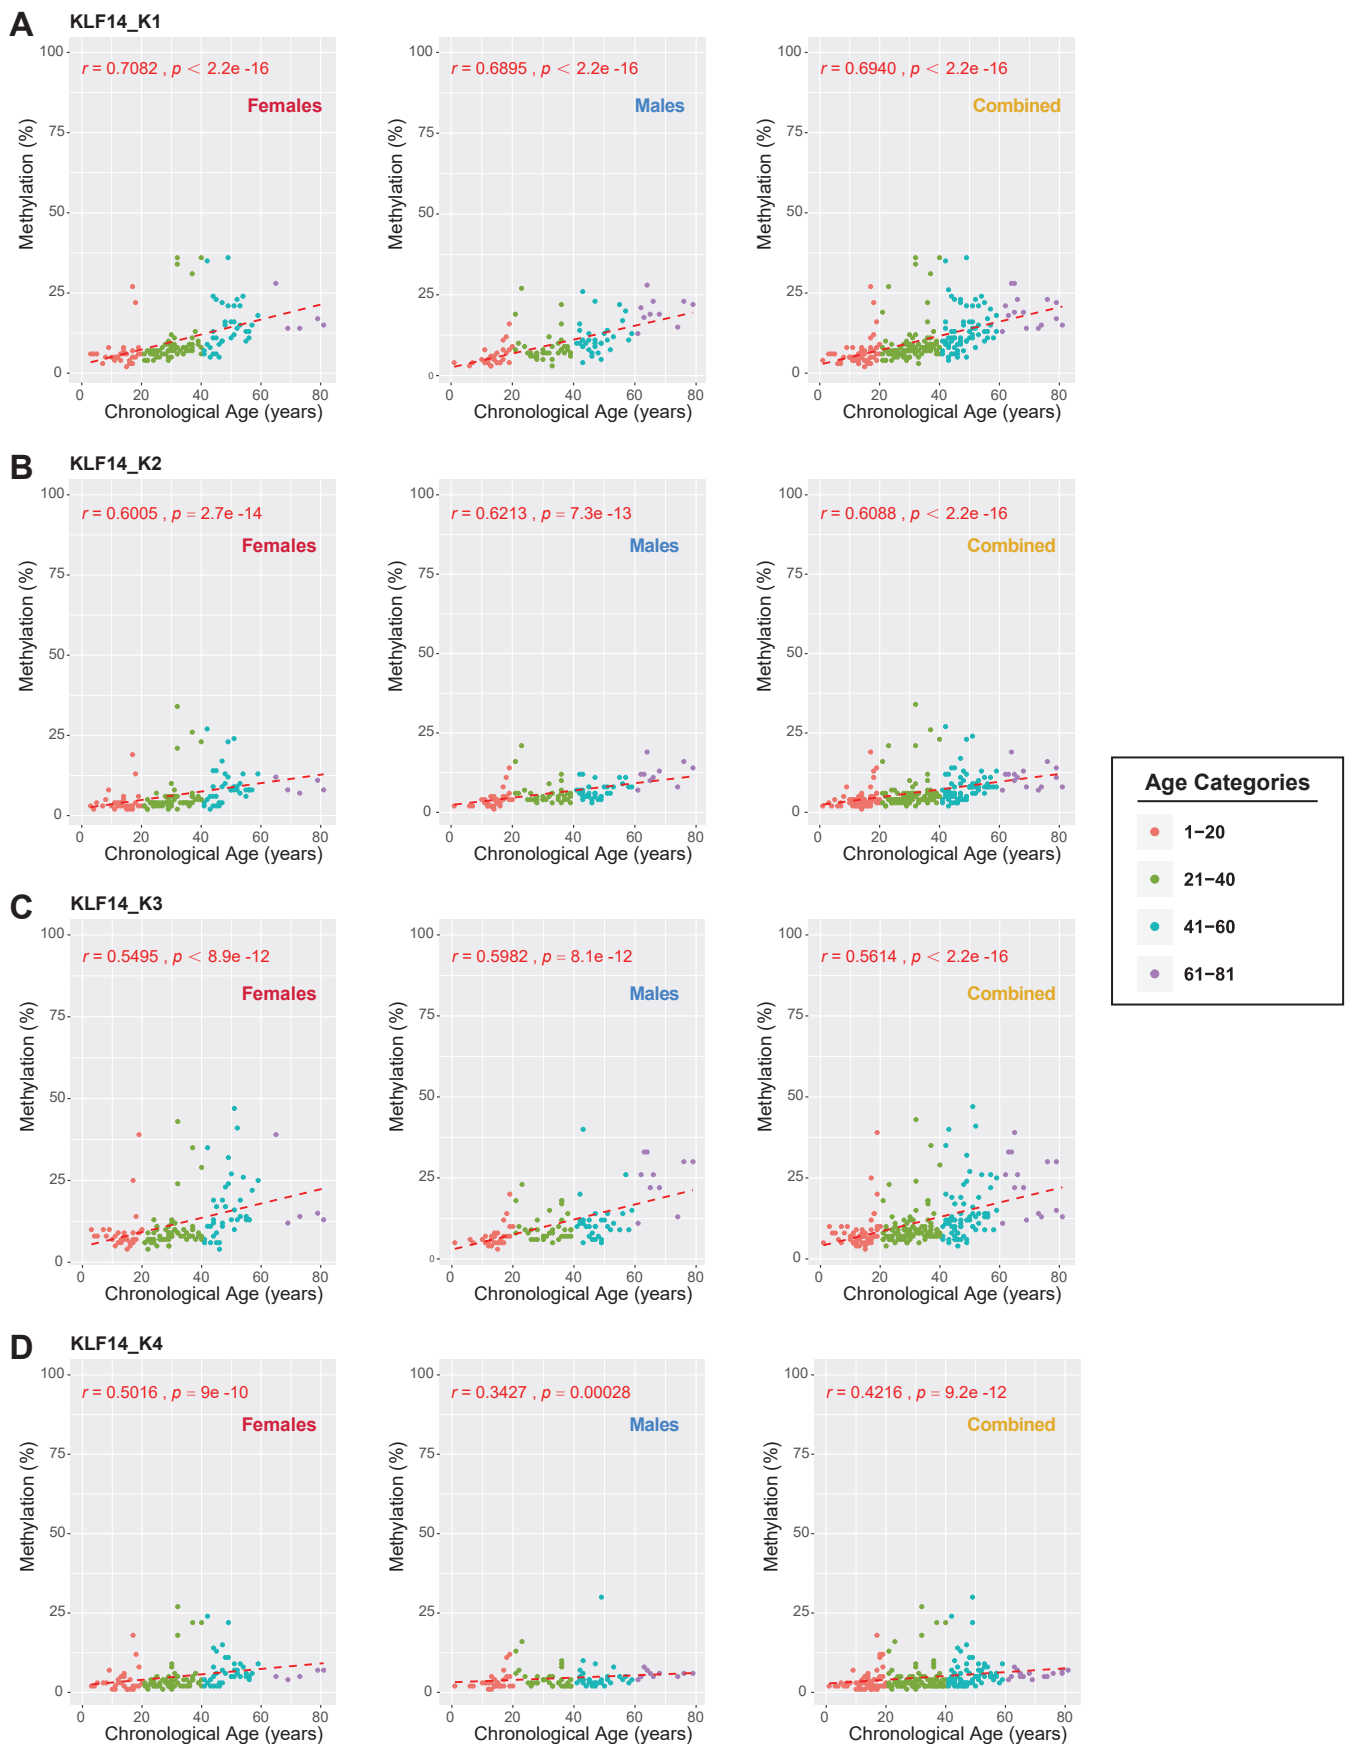

**Supplementary Figure S6** Spearman correlation analyses between different CpG methylation levels of KLF14 and the chronological ages of different gender datasets in CHS cohort ( $n = 240$ , blood samples).

**A.** KLF14\_K1; **B.** KLF14\_K2; **C.** KLF14\_K3; **D.** KLF14\_K4; Detailed CpG information in Supplementary Table S1.

## Supplementary Figure S7

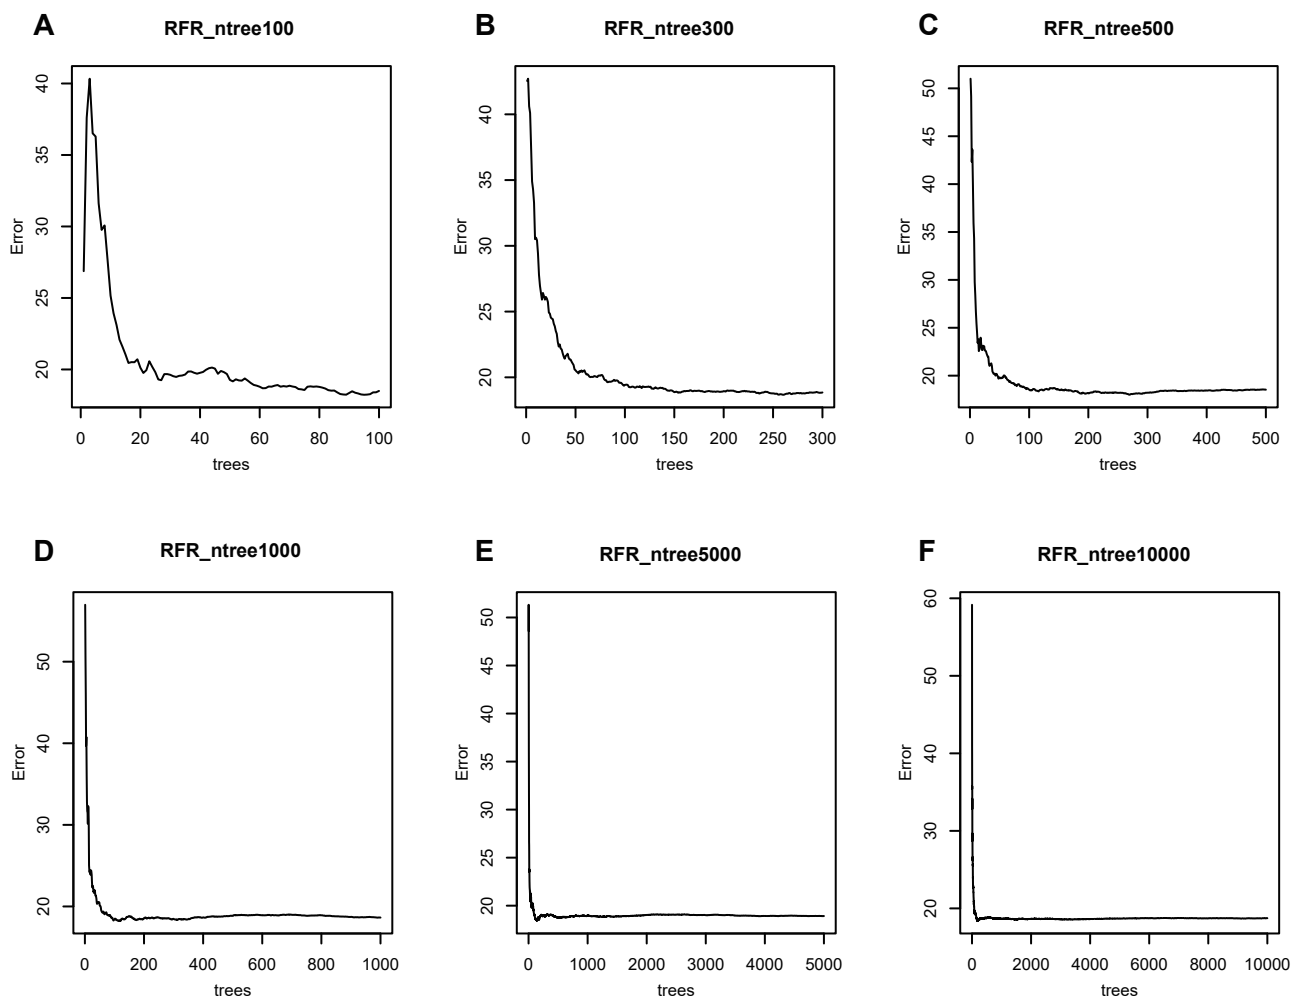

**Supplementary Figure S7** Error rates of random forest regression (RFR) model at six different *ntree* features (100-10000) in CHS cohort ( $n = 240$ , blood samples).

**A.** *ntree* = 100; **B.** *ntree* = 300; **C.** *ntree* = 500; **D.** *ntree* = 1000; **E.** *ntree* = 5000; **F.** *ntree* = 10000.

(*ntree*, number of trees to grow, which should not be set to too small a number, to ensure that every input row gets predicted at least a few times.)

## Supplementary Figure S8

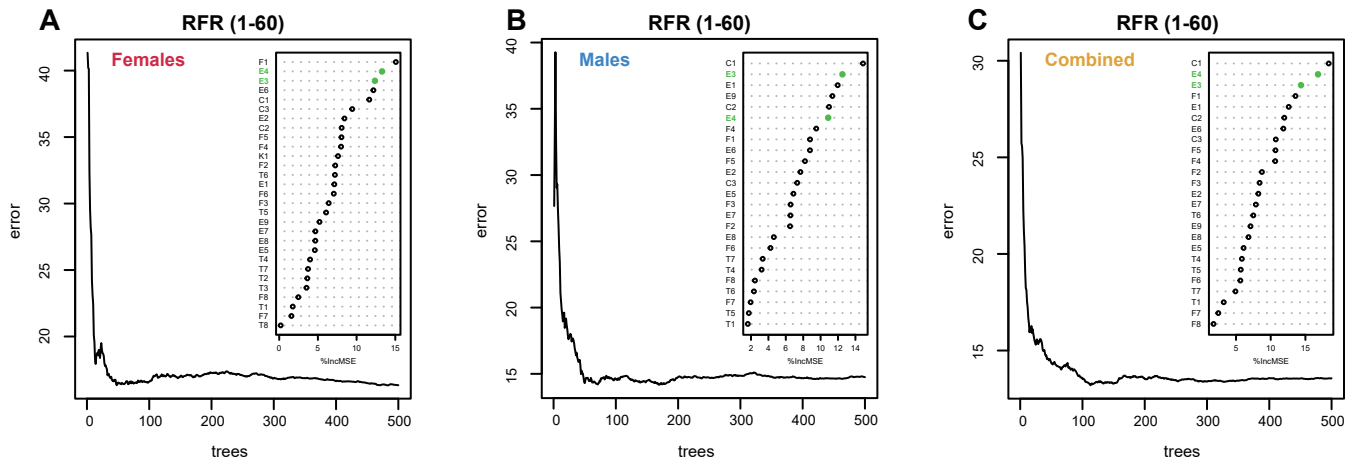

**Supplementary Figure S8** Error rates ( $n_{tree} = 500$ ) and AR-CpG importance ranking of random forest regression (RFR) model at three different gender datasets of 1-60 age categories ( $n = 225$ , blood samples).

**A.** Female dataset of 1-60 age categories ( $n = 127$ ); **B.** Male dataset of 1-60 age categories ( $n = 98$ ); **C.** Combined dataset of 1-60 age categories ( $n = 225$ ). ( $n_{tree}$ , number of trees to grow; %IncMSE, increase in mean squared error.)



## Supplementary Figure S9

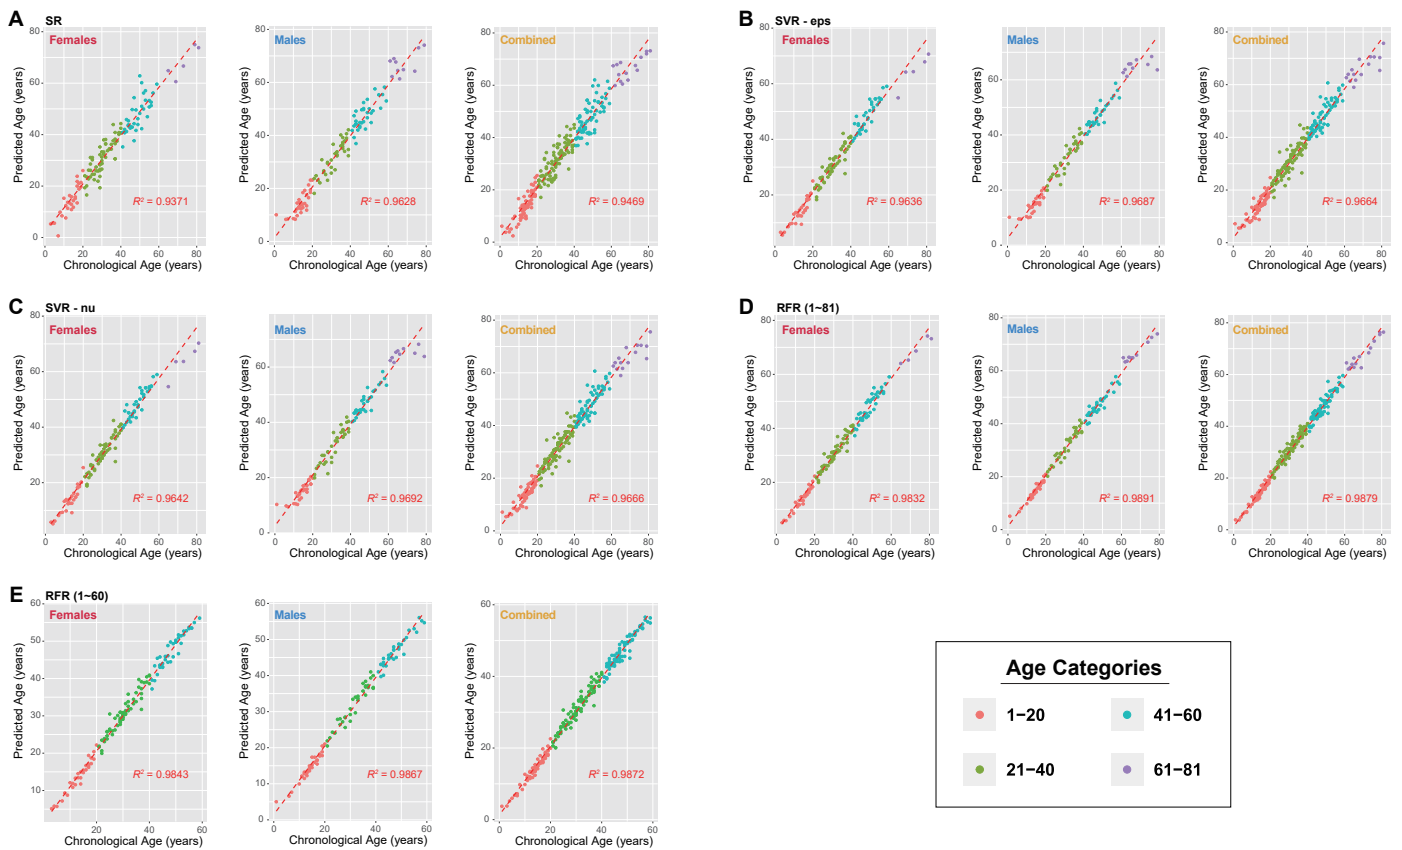

**Supplementary Figure S9** Linear relationships between predicted ages and chronological ages in different machine learning models. ( $R^2$ , coefficient of determination/goodness of fit)

**A.** Stepwise Regression (SR) model;

**B.** Support Vector Regression eps-regression (SVR-eps);

**C.** Support Vector Regression nu-regression (SVR-nu);

**D.** Random Forest Regression (RFR) at 1-81 age categories of CHS cohort;

**E.** Random Forest Regression (RFR) at 1-60 age categories of CHS cohort.
